# Supplementary material
Source: MDPI journal article supplement (https://www.mdpi.com/1424-2818/15/8/908)
Supplement: s1 [file s1]

Table S1. Comparison of the control region in *C. rutilans* and other six species from different Zygoptera families. \*, Gap in sequence; \*\*, TR Alignment Parameters (match, mismatch, indels = 2,5,5).

| Species                                            | Control region position (bp) | Size (bp) | TR region | Copy number |
|----------------------------------------------------|------------------------------|-----------|-----------|-------------|
| <i>Ischnura elegans</i> (Coenagrionidae)           | 14767-15962                  | 1196      | 2         | 3.0/2.9     |
| <i>Matrona basilaris</i> (Calopterygidae)          | 14638-16149                  | 1512      | 2         | 2.4/2.0     |
| <i>Euphaea formosa</i> (Euphaedidae)               | 14782-15700                  | 919       | 2         | 2.5/2.4     |
| <i>Chalcopteryx rutilans</i> (Polythoridae)        | 14756-15653                  | 898       | 2         | 1.9/2.2     |
| <i>Mesopodagrion tibetanum</i> (Megapodagrionidae) | 14637-15363 *                | 727       | 1         | 4.3         |
| <i>Pseudolestes mirabilis</i> (Pseudolestidae)     | 14716-15122 **               | 407       | 1         | 2.1         |
| <i>Platycnemis foliacea</i> (Platycnemididae)      | 14791-15382                  | 592       | 2         | 3.1/2.4     |
